# Supplementary material for: Potential of Alpha-(α)-Solanine as a Natural Inhibitor of Fungus Causing Leaf Spot Disease in Strawberry
Source: MDPI journal article supplement (doi:10.3390/life13020450), 2023-02-06
Supplement: s1 [file s1]

**Table S1.** RNA-Seq data of  $\alpha$ -solanine treated *Curvularia* fungi isolated from leaf spot disease of strawberry fruit.

| Type                    | Control  |             | $\alpha$ -solanine treated fungi |             |
|-------------------------|----------|-------------|----------------------------------|-------------|
|                         | Unigenes | Transcripts | Unigenes                         | Transcripts |
| Total number            | 18344    | 29058       | 17856                            | 24213       |
| Total base              | 24657575 | 54052701    | 24427313                         | 38944986    |
| Largest length (bp)     | 16387    | 16387       | 16387                            | 16387       |
| Smallest length (bp)    | 201      | 201         | 201                              | 201         |
| Average length (bp)     | 1344.18  | 1860.17     | 1368.02                          | 1608.43     |
| N50 length (bp)         | 2449     | 3245        | 2453                             | 2789        |
| E90N50 length (bp)      | 3072     | 2894        | 3072                             | 3012        |
| Mean mapped percent (%) | 74.174   | 78.052      | 73.577                           | 78.338      |
| GC percent (%)          | 51.78    | 52.22       | 51.8                             | 52.05       |
| TransRate score         | 0.20653  | 0.17794     | 0.22352                          | 0.23528     |

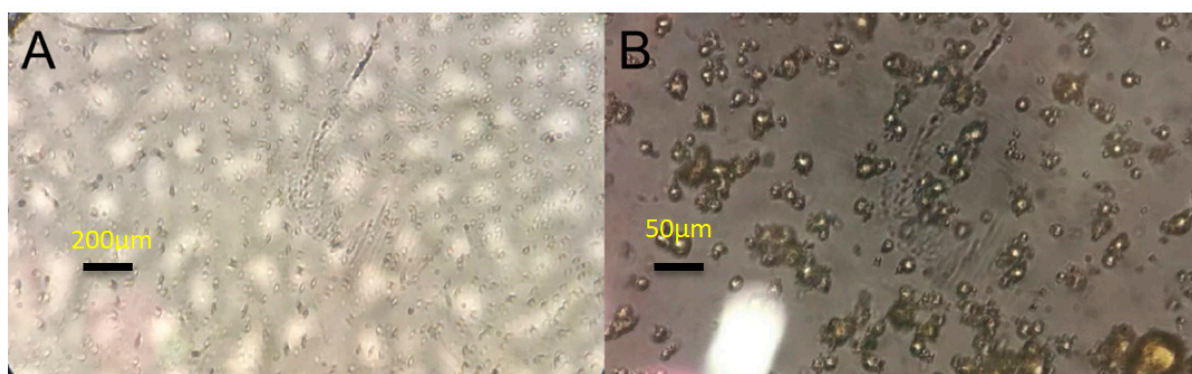

**Figure S1.** The spore germination of *Curvularia trifolii* isolated from strawberry. A- Control B- Treated with  $\alpha$ -solanine (5mg/ml). The  $\alpha$ -solanine treated samples have poor growth, deformed cells and very poor spore growth.

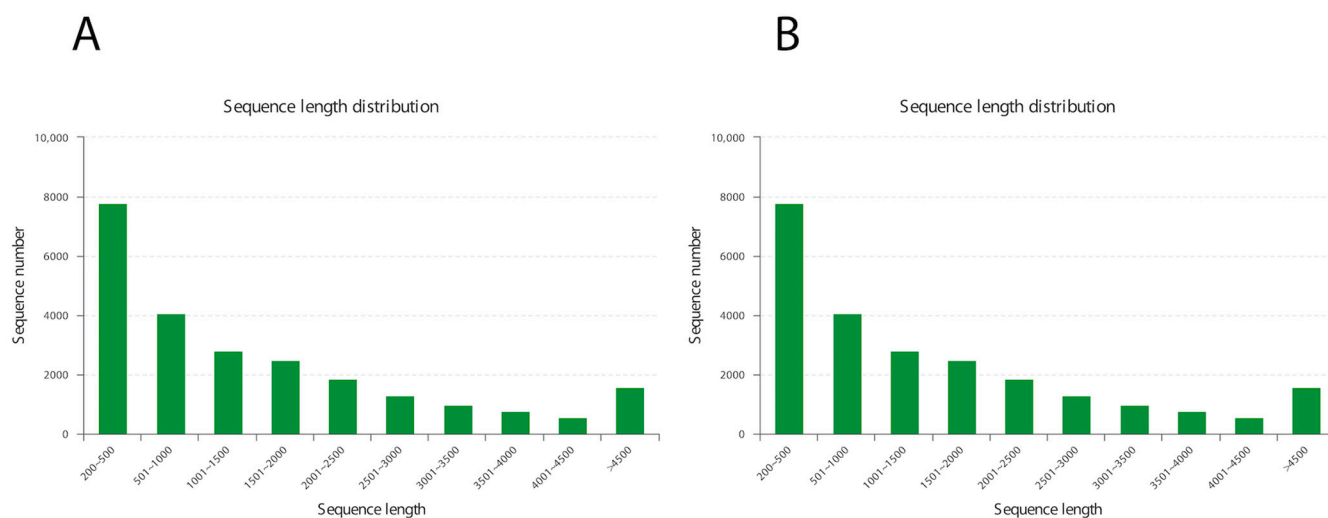

**Figure S2.** Sequence length distribution in control (A) and treated fungi (B) samples.

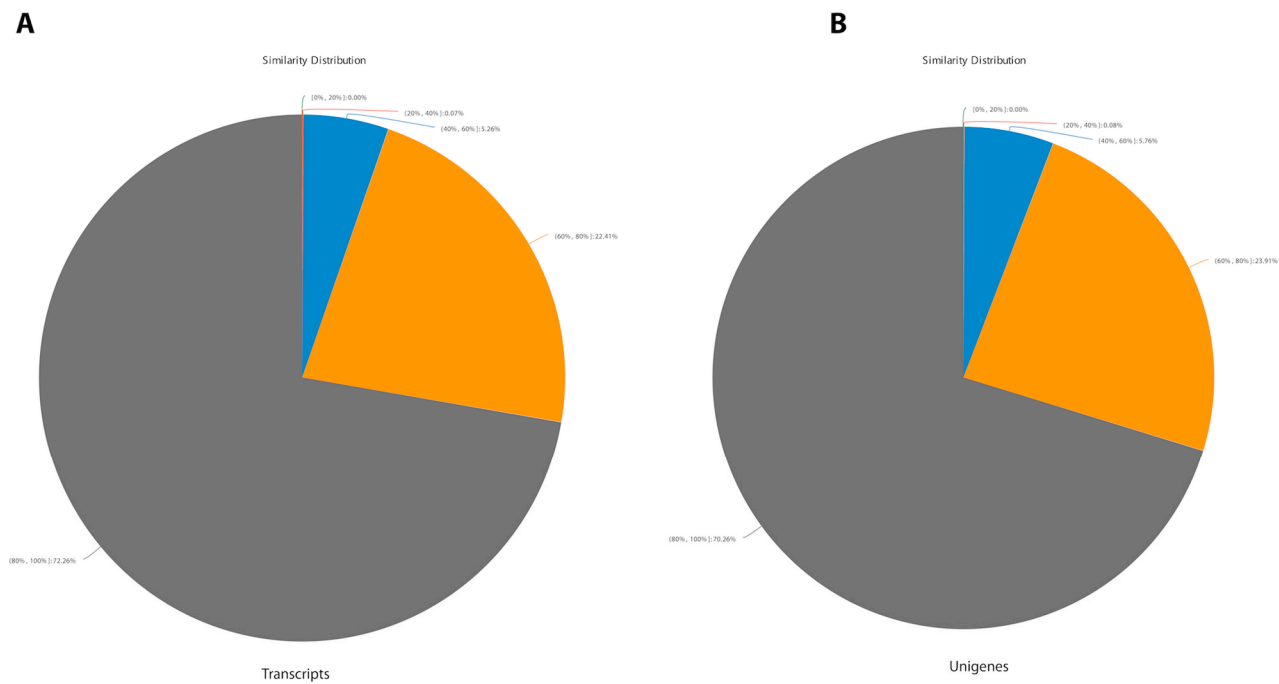

**Figure S3.** Similarity distribution of transcripts (A) and unigenes (B) revealed by BLAST search in non-redundant database.

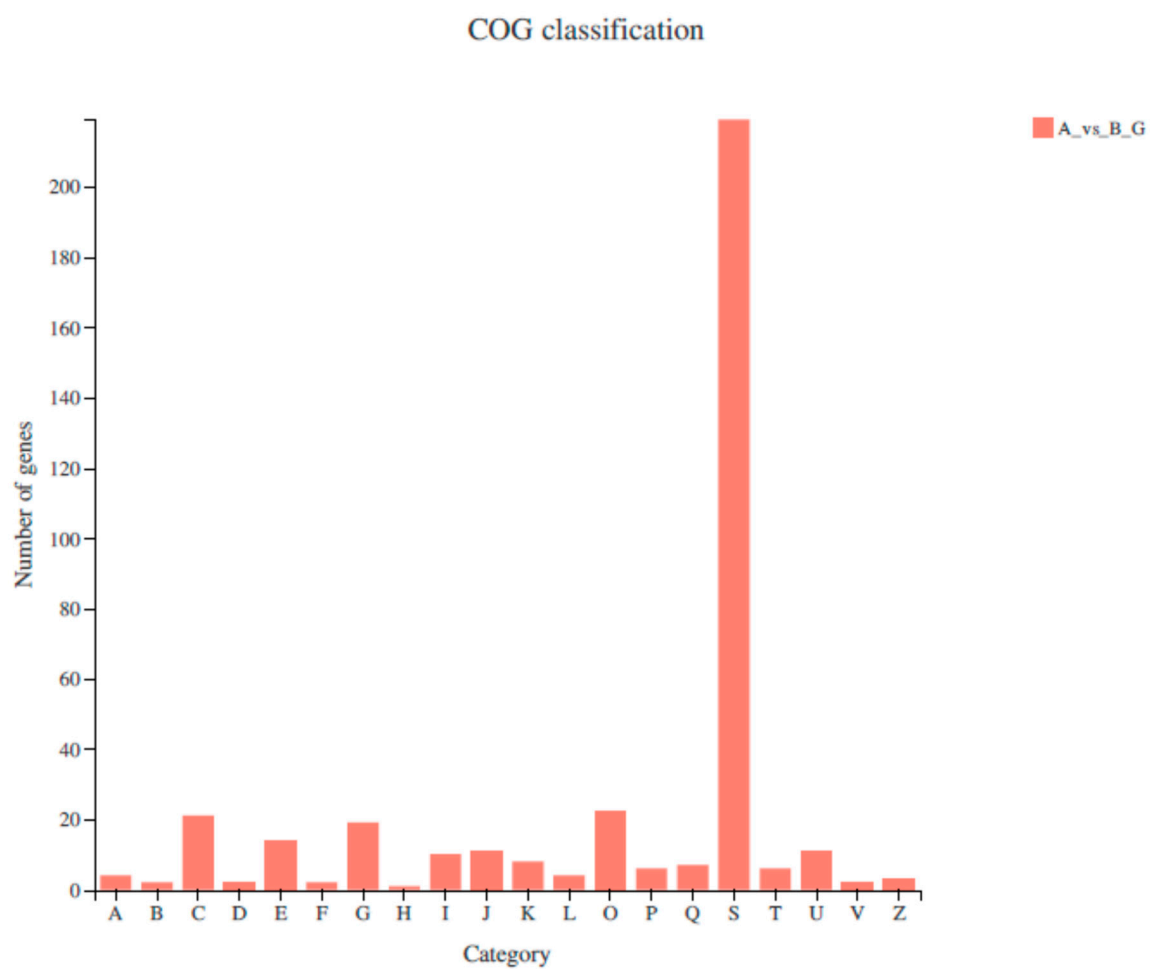

**Figure S4.** Distribution of total differentially expressed unigenes in control (A) and treated (B) *Curvularia*.
